# Supplementary material
Source: MDPI journal article supplement (https://www.mdpi.com/2076-3298/9/12/155)
Supplement: s1 [file s1]

**Table S1** Parameters, Laboratory Analytical procedures and Mexican Technical Standards, describing analytical methodologies and quality controls, considered for the analytical determination of arsenic, fluoride, pH and physicochemical parameters of water.

| Parameter        | Analytical procedure                                                                                                                       | Mexican Standard (NMX),<br>Reference Method |
|------------------|--------------------------------------------------------------------------------------------------------------------------------------------|---------------------------------------------|
| Sampling         | Water Analysis – Sampling of Groundwater                                                                                                   | NMX-AA-152-SCFI-2009                        |
| Arsenic          | Water analysis – measurement of metals by atomic absorption in natural waters, drinking, wastewaters and treated wastewaters – test method | NMX-AA-051-SCFI-2016                        |
| Fluoride         | Waters analysis - determination of fluoride in natural, wastewaters and wastewaters treated - test method                                  | NMX-AA-077-SCFI-2001                        |
| pH               | Water analysis.-measurement of pH in natural waters, wastewaters and treated wastewaters.- test method                                     | NMX-AA-008-SCFI-2016                        |
| Temperature (°C) | Water analysis - determination of temperature in natural waters, wastewaters and treated wastewaters – test method.                        | NMX-AA-007-SCFI-2013                        |

Reference: <https://laboratorios.conagua.gob.mx:8446/LABORATORIOS/Pages/Laboratorios.aspx> (accessed on 9 December 2022);

Available online: <https://www.gob.mx/conagua/articulos/calidad-del-agua> (accessed on 9 December 2022).

**Table S2.** Water quality of major ions in groundwater samples collected in 2006 [26].

| Well No. | Ca<br>mg/L | Mg<br>mg/L | Na<br>mg/L | K<br>mg/L | CO <sub>3</sub><br>mg/L | HCO <sub>3</sub><br>mg/L | Cl<br>mg/L | SO <sub>4</sub><br>mg/L | F<br>mg/L |
|----------|------------|------------|------------|-----------|-------------------------|--------------------------|------------|-------------------------|-----------|
| D139     | 278.6      | 24,0       | 317        | 5.7       | 0                       | 205.6                    | 132        | 820                     | 0.8       |
| D130     | 370.4      | 19,2       | 516        | 6.7       | 0                       | 176.5                    | 355        | 1360                    | 0.8       |
| D136     | 46.8       | 3.8        | 281        | 2.4       | 0                       | 379.4                    | 66         | 294                     | 2.5       |
| J15      | 134.8      | 13.4       | 238        | 11.6      | 0                       | 13.2                     | 94         | 770                     | 4.1       |
| J16      | 116.5      | 1.5        | 251        | 8.2       | 0                       | 242.6                    | 44         | 480                     | 3.3       |
| M6       | 30.9       | 1.3        | 345        | 0.8       | 0                       | 215.7                    | 128        | 304                     | 3.2       |
| M19      | 96.2       | 2.9        | 252        | 3.7       | 0                       | 181.4                    | 66         | 584                     | 2.6       |
| M24      | 67.0       | 7.5        | 153        | 1.9       | 0                       | 179.9                    | 42         | 268                     | 2.4       |
| M26      | 68.6       | 2.8        | 222        | 2.5       | 0                       | 181.9                    | 42         | 376                     | 1.0       |
| M27      | 142.1      | 8.5        | 281        | 4.6       | 0                       | 245.1                    | 46         | 740                     | 1.5       |
| M40      | 31.7       | 8.2        | 167        | 2.2       | 0                       | 250.0                    | 32         | 180                     | 1.8       |
| R2       | 89.1       | 8.2        | 118        | 1.9       | 0                       | 240.2                    | 48         | 190                     | 1.5       |
| S47      | 98.8       | 7.8        | 257        | 2.7       | 0                       | 321.1                    | 62         | 230                     | 1.3       |
| S54      | 107.9      | 9.7        | 120        | 2.2       | 0                       | 250.0                    | 34         | 272                     | 1.3       |
| S56-3    | 122.2      | 13.4       | 84         | 3.8       | 0                       | 253.4                    | 43         | 306                     | 0.7       |
| S56-8    | 179.7      | 15.3       | 284        | 1.5       | 0                       | 252.0                    | 84         | 1080                    | 1.7       |
| S57      | 49.3       | 5.6        | 132        | 4.9       | 0                       | 208.3                    | 22         | 2140                    | 1.0       |
| S98      | 46.9       | 5.3        | 199        | 2.9       | 0                       | 223.0                    | 40         | 206                     | 2.4       |
